# Supplementary material
Source: Springer Nature journal article supplement (https://www.springermedizin.de/resource/supplementary/12993_2011_366_MOESM3_ESM.pdf/9617630)
Supplement: MOESM3 [file 9617630]

A)

## Freezing first 5 trials Shuttlebox

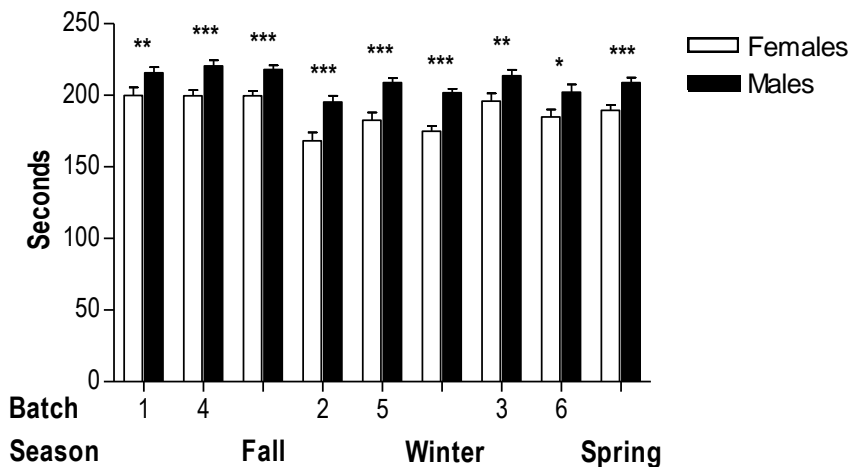Post hoc Duncan's test ( $p < 0.05$ ):

BATCH: 2 and 6 are different from 1, 3 and 4

SEASON: Winter is different from Spring and Fall

Spring is different from Fall

B)

## Avoidances+ITC in the Shuttlebox

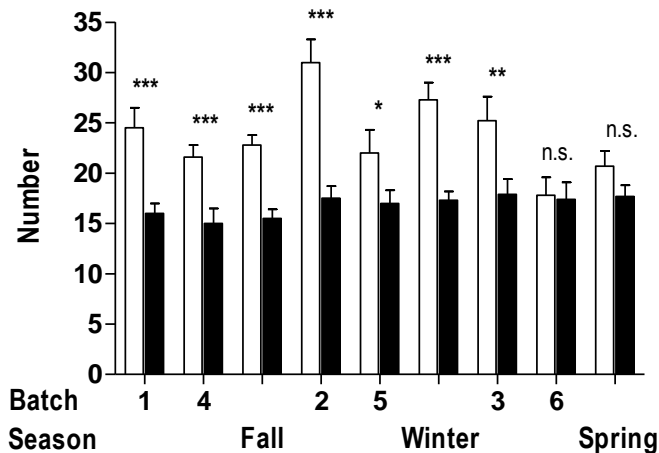Post hoc Duncan's test ( $p < 0.05$ ):

BATCH: 2 is different from 1, 4, 5 and 6

SEASON: Winter is different from Spring and Fall
